# Supplementary material
Source: ML conference proceedings conference paper supplement (https://openreview.net/forum?id=41qxYMnEJw)
Supplement: supplementary_material [file attachment]

# Supplementary Materials: Laplacian Matrix Learning for Point Cloud Attribute Compression with Ternary Search-Based Adaptive Block Partition

Anonymous Authors

Table 1: The frame count of each point cloud sequence

| Dataset | Point Cloud Sequence | Frame Count |
|---------|----------------------|-------------|
| MVUB    | <i>Andrew</i>        | 318         |
|         | <i>David</i>         | 216         |
|         | <i>Phil</i>          | 245         |
|         | <i>Ricardo</i>       | 216         |
|         | <i>Sarah</i>         | 207         |
| 8iVFBv2 | <i>Longdress</i>     | 300         |
|         | <i>Loot</i>          | 300         |
|         | <i>Redandblack</i>   | 300         |
|         | <i>Soldier</i>       | 300         |

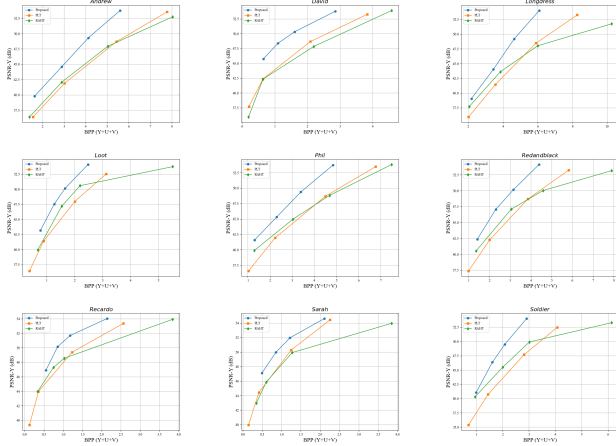

Figure 2: Demonstration of rate-distortion curves for the proposed method, PLT and RAHT on the 9 point cloud sequences.

## 1 DATASET

MVUB [2] and 8iVFBv2 [1] comprise 9 point cloud sequences. Table 1 presents the frame count of each point cloud sequence, while Figure 1 illustrates the visual results of the first frame of each point cloud sequence.

## 2 MORE RATE-DISTORTION CURVES

Due to space constraints, only partial rate-distortion curves of the point clouds are presented in the main text. Figure 2 illustrates the

rate-distortion curves of each point cloud sequence under different methods.

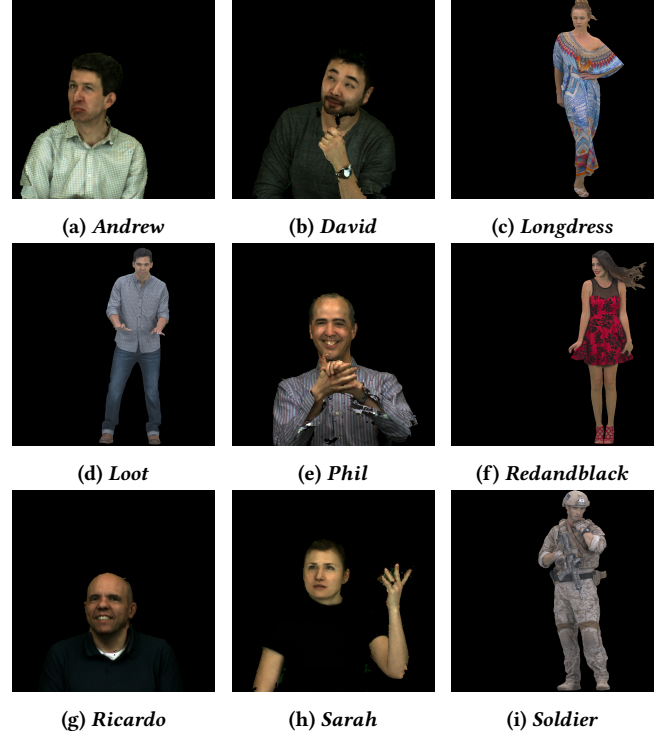

Figure 1: The first frame of 9 point cloud sequences.

## REFERENCES

- [1] 8i Labs. 2017. 8i Voxelized Full Bodies version 2 – A Voxelized Point Cloud Dataset. ISO/IEC JTC1/SC29 Joint WG11/WG1 (MPEG/JPEG) input document.
- [2] Microsoft. 2016. Voxelized Upper Bodies – A Voxelized Point Cloud Dataset. ISO/IEC JTC1/SC29 Joint WG11/WG1 (MPEG/JPEG) input document.
