# Supplementary material
Source: ML conference proceedings conference paper supplement (https://openreview.net/forum?id=41qxYMnEJw)
Supplement: supplementary_material [file attachment]

## Sheet: Sheet1
longdress	plt_rate	plt_distortion1	plt_distortion2	plt_distortion3	plt_encoding_time	plt_decoding_time	raht_rate	raht_distortion1	raht_distortion2	raht_distortion3	raht_encoding_time	raht_decoding_time
1	8.28262	53.2419	55.506	55.3285	21.828	21.39	10.2643	51.7345	54.0824	53.4964				6.09141	53.9871	54.3824	54.2023		2	2
2	5.90979	48.471	51.0081	50.6611	22.562	21.953	6.0087	48.0245	51.0459	50.8395				4.64942	49.1876	50.6429	50.0859		4	2
3	3.56244	41.4452	45.2233	44.8019	22.75	21.89	3.8492	43.6029	47.9233	45.9586				3.44323	44.0115	47.3318	46.1318		8	2
4	2.01414	35.954	40.6319	39.9202	22.796	21.312	2.04945	37.7035	41.2048	40.249				2.18149	39.0661	44.3014	42.5623		16	4
5	0.88976	30.3011	35.9774	34.9808	22.406	20.765								1.31451	35.1624	41.4303	39.4939		32	8
6																									-23.6931	-20.6661
					22.484	21.6363																			-30.1837	-27.8012
																									-27.4829	-33.47
																									-32.3923	-28.1342
loot	plt_rate	plt_distortion1	plt_distortion2	plt_distortion3	plt_encoding_time	plt_decoding_time	raht_rate	raht_distortion1	raht_distortion2	raht_distortion3	raht_encoding_time	raht_decoding_time													-27.6535	-27.5866
1	3.1281	52.5439	57.277	56.7072	19.015	18.562	5.50679	53.7446	55.9342	54.2395				2.47847	54.0953	55.2937	54.5403								-41.6072	-51.1407
2	2.0089	47.9779	53.3543	52.8809	18.984	18.578	2.19455	50.5933	52.2195	51.2946				1.6603	50.1599	54.9259	53.6968								-30.6015	-36.8835
3	0.891898	41.4147	49.2051	49.1047	21.156	19.796	1.5396	46.092	49.9954	48.7249				1.27265	46.5499	54.8836	53.5132								-36.1993	-37.7641
4	0.385642	36.4447	45.4639	45.7	21.359	19.625	0.6793	39.9459	43.9284	42.0283				0.773296	43.1585	49.2244	48.9773								-25.3505	-38.43
5	0.112556	31.8944	42.2729	42.2124	21.187	18.5								0.507902	40.1558	41.0936	41.2763
6
					20.1285	19.1403
																									-30.5738	-33.5418
redandblack	plt_rate	plt_distortion1	plt_distortion2	plt_distortion3	plt_encoding_time	plt_decoding_time	raht_rate	raht_distortion1	raht_distortion2	raht_distortion3	raht_encoding_time	raht_decoding_time
1	5.82191	53.2165	55.907	55.4107	20.468	19.812	7.8945	53.1453	55.0214	54.7254				4.38955	54.1074	54.5239	54.3673
2	3.8555	48.6932	51.5314	51.1438	20	19.515	4.5856	50.0243	52.9375	51.8457				3.15445	50.147	51.8697	51.2361
3	2.0085	42.2598	46.2174	45.3897	21.046	19.796	3.9023	48.8924	51.4956	49.9846				2.30419	46.2663	50.0005	47.444
4	0.989184	37.3774	41.9848	40.4424	21.031	19.5	3.0518	47.0935	49.3485	48.724				1.41393	42.371	47.2201	42.9118
5	0.368002	32.8511	38.2627	35.1725	20.359	19.062								0.83445	39.2503	42.7407	39.109
6
					20.6363	19.6557
soldier	plt_rate	plt_distortion1	plt_distortion2	plt_distortion3	plt_encoding_time	plt_decoding_time	raht_rate	raht_distortion1	raht_distortion2	raht_distortion3	raht_encoding_time	raht_decoding_time
1	4.0698	52.4668	57.1792	56.7868	29.453	27	6.1346	53.2854	55.3843	54.9284				2.91047	54.008	55.1541	54.8279
2	2.81643	47.6898	52.7873	52.8038	28.515	27.625	3.01228	49.9023	51.2843	50.2843				2.08014	49.4939	54.7512	54.1169
3	1.4459	40.7283	48.3218	48.5662	28.5	27.093	2.00734	45.5034	47.9323	46.7232				1.61268	44.9758	54.7087	53.9992
4	0.703978	35.3747	44.2905	44.7105	29.406	26.578	1.3493	40.2943	42.8454	41.0294				0.994915	41.0736	49.0038	48.8188
5	0.230254	29.8858	40.8651	41.3304	28.484	26.828								0.592696	38.3538	43.3993	41.7157
6
	-32.3923	-28.1342			28.9685	27.074
andrew	plt_rate	plt_distortion1	plt_distortion2	plt_distortion3	plt_encoding_time	plt_decoding_time	raht_rate	raht_distortion1	raht_distortion2	raht_distortion3	raht_encoding_time	raht_decoding_time
1	7.78211	53.552	55.3688	54.767	35.921	32.858		137722	3.95083	1103828	8.85329	7.109	28.812	7.78211	6.687	26.171	32.858		5.59767	53.7663	54.117	53.6919			8.03485	54.7453	56.3492	55.2394
2	5.43299	48.7016	50.9666	50.5153	34.843	32.171		77549	2.22465	789225	6.33	6.843	28	5.43299	6.203	25.968	32.171		4.12195	49.2956	50.2047	49.5708			5.0285	47.9335	49.2834	48.8234
3	3.01874	41.8699	45.2679	44.8416	34.515	32.562		24162	0.693135	457445	3.66895	7.109	27.406	3.01874	6.75	25.812	32.562		2.8904	44.5802	46.4021	45.3594			2.8845	40.8456	43.8353	42.8456
4	1.55916	36.3934	40.9337	40.5106	35.531	32.827		7204	0.206661	241543	1.9373	7.125	28.406	1.55916	6.531	26.296	32.827		1.62587	39.7747	43.2753	41.6497			1.3954	36.3843	49.3485	37.3485
5	0.54843	30.8368	37.0891	36.709	34.015	32.561		1677	0.0481081	85819	0.688314	6.984	27.031	0.54843	6.39	26.171	32.561		0.883095	36.479	40.5598	39.1333			0.68334	31.8349	34.3485	32.8453
6																							-27.6535	-27.5866
					35.2025	32.6045
david	plt_rate	plt_distortion1	plt_distortion2	plt_distortion3	plt_encoding_time	plt_decoding_time	raht_rate	raht_distortion1	raht_distortion2	raht_distortion3	raht_encoding_time	raht_decoding_time
1	3.83429	53.2684	55.7853	55.0902	41.202	40.296		2939	3841	372527	336161		20.359	20.25	0.359	0.234			2.85252	53.7722	54.723	53.8722			4.5823	53.9056	54.9238	53.8347
2	2.09488	48.6862	51.776	51.2381	43.779	40.328		1547	1530	206581	181241		0.218	0.406	21.921	21.234			1.60755	50.3275	52.8954	50.9208			2.1945	47.8454	50.2384	48.8345
3	0.635502	42.3668	47.8121	47.1718	42.107	41.609		523	270	64128	53662		0.218	0.39	20.703	20.796			1.09372	48.3734	52.1333	49.5626			0.6385	42.345	47.2394	46.9238
4	0.205619	37.7216	45.2727	44.4544	44.123	40.078		203	83	20992	17090		0.203	0.468	21.671	21.781			0.650012	45.7614	47.0889	46.8531			0.1934	35.9584	37.274	36.725
5	0.0597382				42.702			71	29	5968	5079		0.234	0.406	20.906	21.156			0.42639	41.93	41.7648	41.1083
6																							-41.6072	-51.1407
					42.8027	40.5778
phil	plt_rate	plt_distortion1	plt_distortion2	plt_distortion3	plt_encoding_time	plt_decoding_time	raht_rate	raht_distortion1	raht_distortion2	raht_distortion3	raht_encoding_time	raht_decoding_time
1	6.7675	53.4769	55.5408	54.7346	47.092	45.453		74609	55401	661773	613284		2	2.281	21.765	21.046			4.84487	53.7398	54.0482	53.6757			7.492	53.822	54.923	53.192
2	4.50727	48.6868	51.174	50.4463	47.029	44.5		50451	31778	447731	405838		1.859	2.265	21.968	20.937			3.3962	49.3778	50.6409	49.644			4.693	47.9234	49.3495	48.123
3	2.23486	41.9321	45.9053	44.735	46.17	45.156		25739	9326	226708	202228		1.953	2.25	21.546	20.421			2.30404	45.3075	47.8319	45.9547			3.035	44.946	46.239	44.938
4	1.0314	36.5553	41.8906	40.5093	46.796	45.015		12081	2444	105474	94141		2.031	2.328	21.953	20.484			1.30314	41.5723	44.8274	42.6327			2.395	41.3844	43.694	41.456
5	0.332651	30.9095	38.1866	36.6459	46.03	44.968		3846	379	35079	29761		1.859	2.203	21.078	20.89			0.739992	38.6794	41.9177	39.9108			0.8453	36.9345	38.2034	37.934
6																							-30.6015	-36.8835
					46.7717	45.031
recardo	plt_rate	plt_distortion1	plt_distortion2	plt_distortion3	plt_encoding_time	plt_decoding_time	raht_rate	raht_distortion1	raht_distortion2	raht_distortion3	raht_encoding_time	raht_decoding_time
1	2.56141	53.3574	55.6602	55.3957	27.343	24.515									2.14039	54.0334	54.2497	53.819							3.84	53.9234	54.234	53.9456
2	1.23351	49.3993	52.0712	52.0203	25.562	25.921									1.18007	51.6855	53.1077	51.864							1.03	48.56	50.395	49.3495
3	0.358787	43.9746	48.8582	48.6588	26.296	24.578									0.858179	50.1693	52.6362	50.8486							0.75	46.304	48.056	47.2395
4	0.126566	39.3539	46.2403	45.5164	26.718	24.906									0.553963	46.9097	48.1141	47.2575							0.534	43.9565	45.235	44.295
5	0.0399041	34.8732	43.2642	42.9932	25.562	26.609									0.304468	42.4804	43.9976	41.476							0.1954	40.2934	42.4935	41.9725
6																							-36.1993	-37.7641
					26.4797	24.98
sarah	plt_rate	plt_distortion1	plt_distortion2	plt_distortion3	plt_encoding_time	plt_decoding_time	raht_rate	raht_distortion1	raht_distortion2	raht_distortion3	raht_encoding_time	raht_decoding_time
1	2.25428	54.4267	57.4369	56.594	40.296	38.343		169233	212830	11.437	28.859	10.781	27.562		2.10773	54.6155	56.1662	55.2686							3.8455	53.9564	55.2394	54.2129
2	1.25055	50.2842	53.6586	52.9889	40.249	38.655		97344	114604	11.156	29.093	10.921	27.734		1.21817	51.967	54.501	52.6918							1.2745	49.9234	51.242	50.2395
3	0.414117	44.4277	49.4669	49.0494	40.733	38.64		34021	36165	11.546	29.187	10.875	27.765		0.852159	49.9574	53.7054	51.3818							0.6045	45.867	47.934	46.2934
4	0.146439	39.9551	46.0778	45.1806	41.249	37.234		12935	11884	11.281	29.968	10.453	26.781		0.493745	47.1183	50.0552	48.9643							0.34586	42.9435	44.3234	43.9143
5	0.0442403	35.3634	43.8645	43.0778	39.467	37.999		4464	3034	11.296	28.171	10.89	27.109		0.29067	43.9347	45.1273	45.0189							0.1935	40.2934	41.9284	41.2835
6																							-25.3505	-38.43
					40.6318	38.218
		-19.58
		-49.92
		-21.58
		-41.94
		-22.2
		-42.31
		-26.23
		-28.37
		-45.07
		-33.0222
